# Supplementary material
Source: ML conference proceedings conference paper supplement (https://openaccess.thecvf.com/content/ICCV_2017/html/Jin_End-To-End_Face_Detection_ICCV_2017_paper.html)
Supplement: Supplementary file 1 [file Jin_End-To-End_Face_Detection_ICCV_2017_supplemental.pdf]

# End-to-end Face Detection and Cast Grouping in Movies Using Erdős-Rényi Clustering: Supplementary Material

SouYoung Jin<sup>1</sup>, Hang Su<sup>1</sup>, Chris Stauffer<sup>2</sup>, and Erik Learned-Miller<sup>1</sup>

<sup>1</sup>College of Information and Computer Sciences, University of Massachusetts, Amherst

<sup>2</sup>Visionary Systems and Research (VSR)

Table 1: Clustering performance comparisons on various data sets. The leftmost shows our **rank1count** by setting a threshold automatically. For the rest of the columns, we show f-scores using optimal (oracle-supplied) thresholds. (**1st place, 2nd place, 3rd place**).

| Test set |               | Verification system + Link-based clustering algorithm |              |              |                         |                          | Other clustering algorithms               |                          |            |                         |              |                      |       |
|----------|---------------|-------------------------------------------------------|--------------|--------------|-------------------------|--------------------------|-------------------------------------------|--------------------------|------------|-------------------------|--------------|----------------------|-------|
|          |               | Rank-1 Count (automatic threshold)                    | Rank-1 Count | L2           | Template Adaptation [2] | Rank-Order Distance [10] | Rank-Order Distance based Clustering [10] | Affinity Propagation [4] | DBSCAN [3] | Spectral Clustering [8] | Birch [9]    | MiniBatch KMeans [7] |       |
| Video    | BBT s01 [1]   | e01                                                   | .7145        | .7225        | <b>.7386</b>            | .7170                    | <b>.8064</b>                              | <b>.7278</b>             | .1707      | .4137                   | .6884        | .3776                | .2166 |
|          |               | e02                                                   | .7414        | <b>.7671</b> | <b>.7561</b>            | <b>.7520</b>             | .7154                                     | .6537                    | .1593      | .3216                   | .6147        | .2337                | .2018 |
|          |               | e03                                                   | <b>.8428</b> | <b>.8552</b> | <b>.8329</b>            | .8192                    | .6660                                     | .6367                    | .2130      | .2985                   | .6578        | .2366                | .2131 |
|          |               | e04                                                   | <b>.7602</b> | <b>.7690</b> | .7151                   | <b>.7687</b>             | .6364                                     | .7001                    | .2118      | .2886                   | .6520        | .2156                | .1847 |
|          |               | e05                                                   | <b>.8217</b> | <b>.8250</b> | .7420                   | <b>.7858</b>             | .6330                                     | .7035                    | .2335      | .2444                   | .5980        | .1812                | .2120 |
|          |               | e06                                                   | <b>.7563</b> | <b>.7578</b> | .6342                   | <b>.7247</b>             | .5577                                     | .5588                    | .1615      | .1948                   | .5806        | .1511                | .1387 |
|          | Buffy s05 [1] | e01                                                   | <b>.6634</b> | <b>.6938</b> | .4950                   | <b>.6902</b>             | .3819                                     | .5935                    | .1711      | .1755                   | .5762        | .1439                | .1285 |
|          |               | e02                                                   | .5582        | <b>.6645</b> | .3315                   | .5452                    | .2800                                     | <b>.5837</b>             | .1705      | .1185                   | <b>.5892</b> | .1151                | .1087 |
|          |               | e03                                                   | <b>.5378</b> | <b>.5479</b> | .3735                   | <b>.5569</b>             | .2390                                     | .4595                    | .1346      | .1322                   | .4566        | .1077                | .1063 |
|          |               | e04                                                   | .4203        | <b>.4859</b> | .3523                   | .4549                    | .3049                                     | <b>.5171</b>             | .1643      | .1445                   | <b>.5273</b> | .1187                | .1179 |
|          |               | e05                                                   | <b>.6235</b> | <b>.6952</b> | .5064                   | <b>.6739</b>             | .3073                                     | .5640                    | .1435      | .1740                   | .5540        | .1390                | .1251 |
|          |               | e06                                                   | <b>.5932</b> | <b>.6923</b> | .3001                   | <b>.5856</b>             | .2807                                     | .5455                    | .1765      | .1009                   | .5071        | .1041                | .0995 |
|          |               | Hannah [6]                                            | <b>.6436</b> | <b>.6813</b> | .2581                   | .3620                    | <b>.4123</b>                              | .3955                    | .1886      | .1230                   | .3344        | .1240                | .1052 |
|          | Image         | LFW [5]                                               | <b>.8532</b> | <b>.8943</b> | <b>.8498</b>            | .3735                    | .5989                                     | .5812                    | .3197      | .0117                   | .2538        | .4520                | .3133 |

## 1. Performance Comparisons

In Table 1, except for the leftmost column of results, we report the best  $F_{0.5}$  scores using optimal (oracle-supplied) thresholds for both the distance threshold (a parameter that is part of all of the algorithms) and the number of clusters (a parameter required by a subset of the algorithms, such as k-nearest neighbors). **The comparison shows that the proposed link-based clustering algorithm with rank-1 counts outperforms the state-of-the-art on all four data sets in  $F_{0.5}$  score.** Unlike other clustering algorithms, our proposed approach can scale from small clustering problems (5-8 subjects in BBT) to large clustering problems (5730 subjects in LFW).

In Table 2, we also report traditional measures (pairwise precision, pairwise recall, and F-measure) on the subset of true positive tracklets that are given to each algorithm.

## References

- [1] M. Bauml, M. Tapaswi, and R. Stiefelhagen. Semi-supervised learning with constraints for person identification in multimedia data. In *Proc. CVPR*, 2013. 1, 2
- [2] N. Crosswhite, J. Byrne, C. Stauffer, O. M. Parkhi, Q. Cao, and A. Zisserman. Template adaptation for face verification and identification. In *Face and Gesture*, 2017. 1, 2
- [3] M. Ester, H.-P. Kriegel, J. Sander, and X. Xu. A density-based algorithm for discovering clusters in large spatial databases with noise. *KDD*, 96(34):226–231, 1996. 1, 2
- [4] B. J. Frey and D. Dueck. Clustering by passing messages between data points. *Science*, 315(5814):972–976, 2007. 1, 2
- [5] G. B. Huang, M. Mattar, T. Berg, and E. Learned-Miller. Labeled faces in the wild: A database for studying face recognition in unconstrained environments. In *The Workshop on Faces in Real-Life Images at ECCV*, 2008. 1, 2

Table 2: Clustering performance comparisons evaluated on traditional measures. (1st place, 2nd place, 3rd place).

| Test set |                  |            | Verification system + Link-based clustering algorithm |              |              |                            |                             | Other clustering algorithms                  |                             |            |                            |           |                         |
|----------|------------------|------------|-------------------------------------------------------|--------------|--------------|----------------------------|-----------------------------|----------------------------------------------|-----------------------------|------------|----------------------------|-----------|-------------------------|
|          |                  |            | Rank-1 Count<br>(automatic threshold)                 | Rank-1 Count | L2           | Template<br>Adaptation [2] | Rank-Order<br>Distance [10] | Rank-Order Distance<br>based Clustering [10] | Affinity<br>Propagation [4] | DBSCAN [3] | Spectral<br>Clustering [8] | Birch [9] | MiniBatch<br>KMeans [7] |
| Video    | BBT<br>s01 [1]   | e01        | .8226                                                 | .8486        | <b>.8613</b> | .8364                      | <b>.9669</b>                | <b>.8732</b>                                 | .2108                       | .4880      | .8193                      | .4572     | .2666                   |
|          |                  | e02        | .9289                                                 | <b>.9726</b> | <b>.9550</b> | <b>.9502</b>               | .9046                       | .8456                                        | .2034                       | .4094      | .7785                      | .2997     | .2584                   |
|          |                  | e03        | <b>.9664</b>                                          | <b>.9908</b> | <b>.9903</b> | .9299                      | .7873                       | .7751                                        | .2437                       | .4404      | .7810                      | .3158     | .2775                   |
|          |                  | e04        | <b>.8985</b>                                          | <b>.9188</b> | .8638        | <b>.9107</b>               | .8040                       | .8387                                        | .2592                       | .3831      | .8207                      | .2863     | .2385                   |
|          |                  | e05        | <b>.9769</b>                                          | <b>.9940</b> | .9215        | <b>.9275</b>               | .7879                       | .8067                                        | .2600                       | .3866      | .7638                      | .2713     | .3354                   |
|          |                  | e06        | <b>.9795</b>                                          | <b>.9876</b> | .8605        | <b>.9644</b>               | .7828                       | .7041                                        | .2085                       | .3930      | .8408                      | .2859     | .2538                   |
|          | Buffy<br>s05 [1] | e01        | <b>.8487</b>                                          | <b>.8727</b> | .7016        | <b>.8626</b>               | .5447                       | .7249                                        | .1997                       | .2968      | .7512                      | .2123     | .1835                   |
|          |                  | e02        | <b>.6737</b>                                          | <b>.7665</b> | .4904        | .6730                      | .4104                       | .6384                                        | .1883                       | .2386      | <b>.8196</b>               | .1932     | .1764                   |
|          |                  | e03        | <b>.6872</b>                                          | <b>.7159</b> | .5492        | <b>.7404</b>               | .3731                       | .6094                                        | .1538                       | .2494      | .6392                      | .1725     | .1638                   |
|          |                  | e04        | .5496                                                 | <b>.5847</b> | .4983        | .5586                      | .4570                       | <b>.6789</b>                                 | .1854                       | .2603      | <b>.6943</b>               | .1854     | .1733                   |
|          |                  | e05        | <b>.8205</b>                                          | <b>.8301</b> | .6682        | <b>.8173</b>               | .4751                       | .6663                                        | .1573                       | .3536      | .7686                      | .2279     | .2019                   |
|          |                  | e06        | <b>.7509</b>                                          | <b>.8555</b> | .4281        | <b>.7083</b>               | .4489                       | .6224                                        | .2071                       | .1925      | .7188                      | .1727     | .1583                   |
|          |                  | Hannah [6] | <b>.7634</b>                                          | <b>.8081</b> | .3526        | .4766                      | <b>.5249</b>                | .4955                                        | .2272                       | .1723      | .4227                      | .1648     | .1387                   |
|          | Image            | LFW [5]    | <b>.8532</b>                                          | <b>.8943</b> | <b>.8498</b> | .3735                      | .5989                       | .5812                                        | .3197                       | .0117      | .2538                      | .4520     | .3133                   |

- [6] A. Ozerov, J.-R. Vigouroux, L. Chevallier, and P. Pérez. On evaluating face tracks in movies. In *Proc. ICIP*, 2013. 1, 2
- [7] D. Sculley. Web-scale k-means clustering. In *Proc. WWW*, pages 1177–1178. ACM, 2010. 1, 2
- [8] J. Shi and J. Malik. Normalized cuts and image segmentation. *TPAMI*, 22(8):888–905, 2000. 1, 2

- [9] T. Zhang, R. Ramakrishnan, and M. Livny. Birch: an efficient data clustering method for very large databases. In *SIGMOD*. ACM, 1996. 1, 2
- [10] C. Zhu, F. Wen, and J. Sun. A rank-order distance based clustering algorithm for face tagging. In *Proc. CVPR*, 2011. 1, 2
